# Supplementary material for: Tox2 is required for the maintenance of GC TFH cells and the generation of memory TFH cells
Source: PubMed Central journal article supplement (PMC8500513; doi:10.1126/sciadv.abj1249), 2021-10-08
Supplement: sciadv.abj1249_sm.pdf [file sciadv.abj1249_sm.pdf]

Supplementary Materials for

**Tox2 is required for the maintenance of GC T<sub>FH</sub> cells and the generation of memory T<sub>FH</sub> cells**

Shu Horiuchi, Hanchih Wu, Wen-Chun Liu, Nathalie Schmitt, Jonathan Provot, Yang Liu, Salah-Eddine Bentebibel, Randy A. Albrecht, Michael Schotsaert, Christian V. Forst, Bin Zhang, Hideki Ueno\*

\*Corresponding author. Email: ueno.hideki.8e@kyoto-u.ac.jp

Published 8 October 2021, *Sci. Adv.* 7, eabj1249 (2021)  
DOI: 10.1126/sciadv.abj1249

**This PDF file includes:**

Figs. S1 to S7

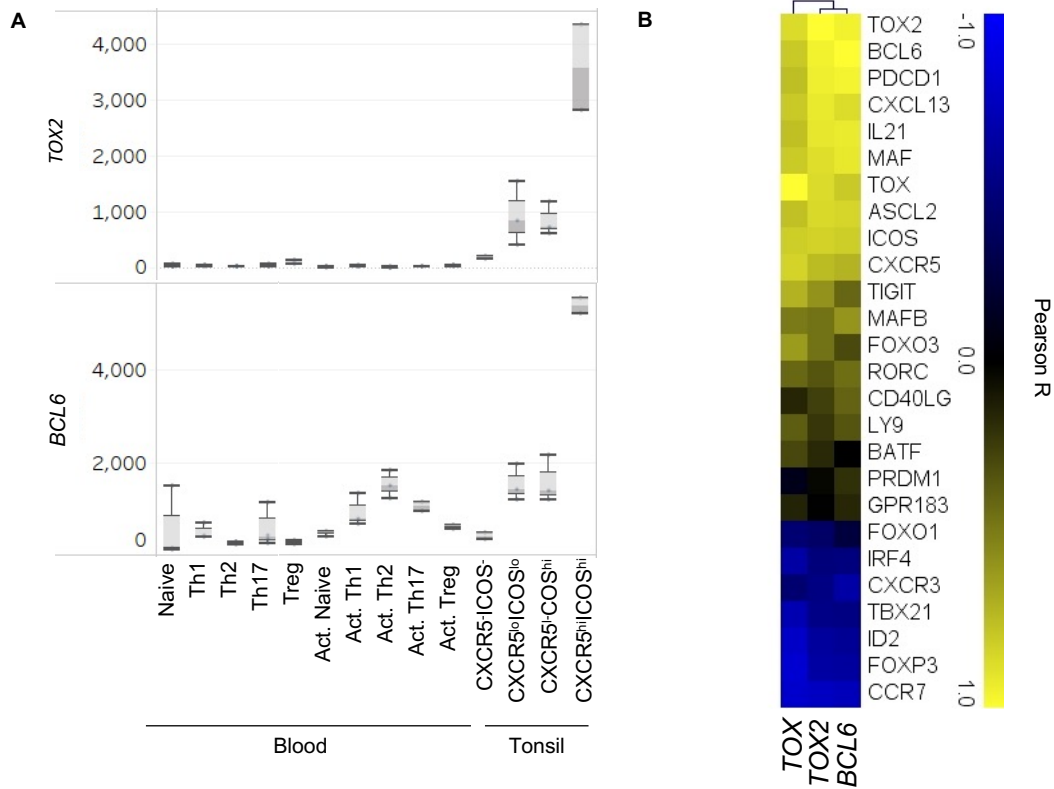

**Fig. S1 High *Tox2* expression is exclusive in GC Tfh cells**

- (A) mRNA expression pattern of *TOX2* and *BCL6* in human tonsillar and blood CD4<sup>+</sup> T cell subsets. Human blood CD4<sup>+</sup> T cell subsets were sorted as follows: Naive – CD45RA<sup>+</sup>CCR7<sup>+</sup>; Th1 – CD45RA<sup>-</sup>CXCR3<sup>+</sup>CCR6<sup>-</sup>; Th2 – CD45RA<sup>-</sup>CXCR3<sup>-</sup>CCR6<sup>-</sup>CCR4<sup>+</sup>; Th17 – CD45RA<sup>-</sup>CXCR3<sup>-</sup>CCR6<sup>+</sup>CCR4<sup>+</sup>; Treg – CD25<sup>+</sup>CD127<sup>-</sup>. The sorted cells were activated for 48 h with anti-CD3 and anti-CD28. The expression of *TOX2* and *BCL6* was analyzed by DNA microarray. N=3.
- (B) Correlation between *TOX2*, *TOX*, and *BCL6* mRNA and Tfh-related molecule mRNA by tonsillar CD4<sup>+</sup> T cells after 48 h stimulation with anti-CD3. Indicated by Pearson R values.

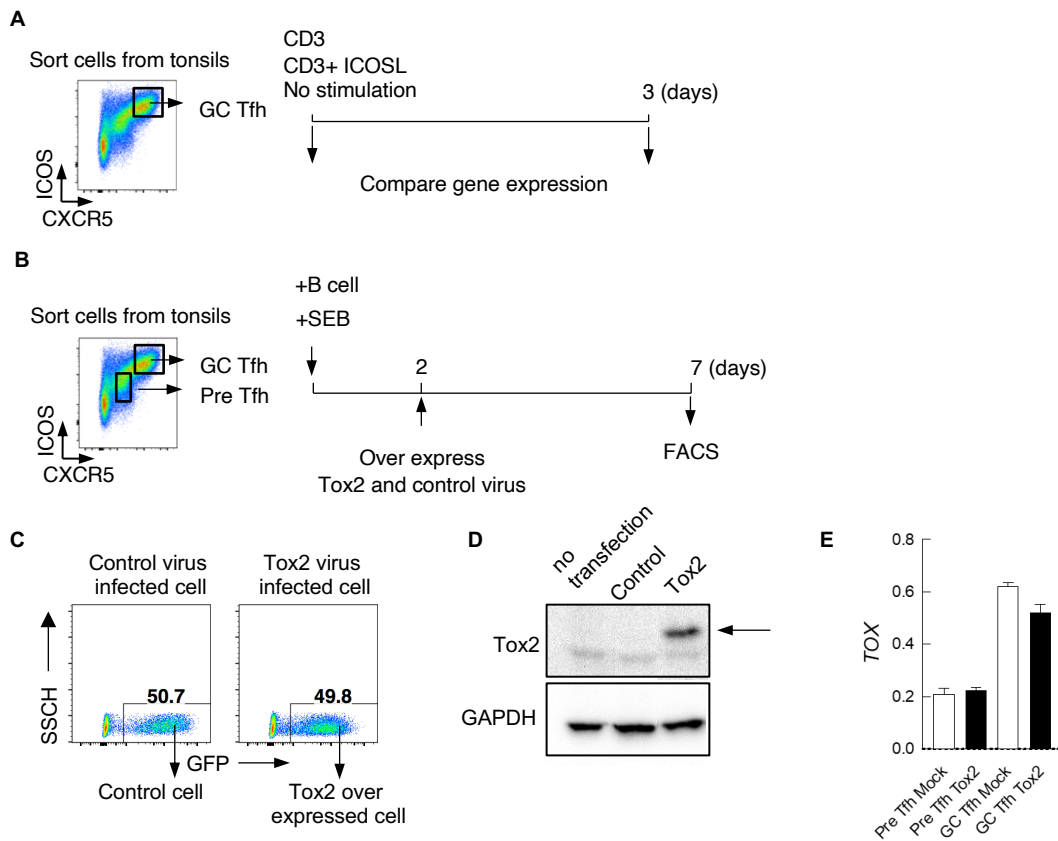

**Fig. S2 Human tonsillar Tfh cell culture and Tox2 transfection**

- (A) Experiment procedure for CD3 and ICOSL stimulated Tonsillar GC Tfh cells. FACS-sorted GC Tfh cells were cultured with CD32-transfected L cells or CD32 and ICOSL-co-transfected L cells in the presence of anti-CD3 for 72 h for transcriptional profiling.
- (B) Experiment procedure for Tox2 transfection in Tonsillar GC Tfh and Pre Tfh cells. FACS-sorted GC Tfh or Pre Tfh cells were cultured in the presence of SEB with B cells for 2 days. Cultured cells were transfected with control or Tox2 over expressing HDV and further cultured for additional 5 days for analysis.
- (C) Frequency of GFP+ control and Tox2 transfected CD4+ T cells.
- (D) Tox2 protein expression in mock or Tox2-transfected cells assessed by WB.
- (E) TOX gene expression by mock- or Tox2-transfected cells measured by QuantiGene.

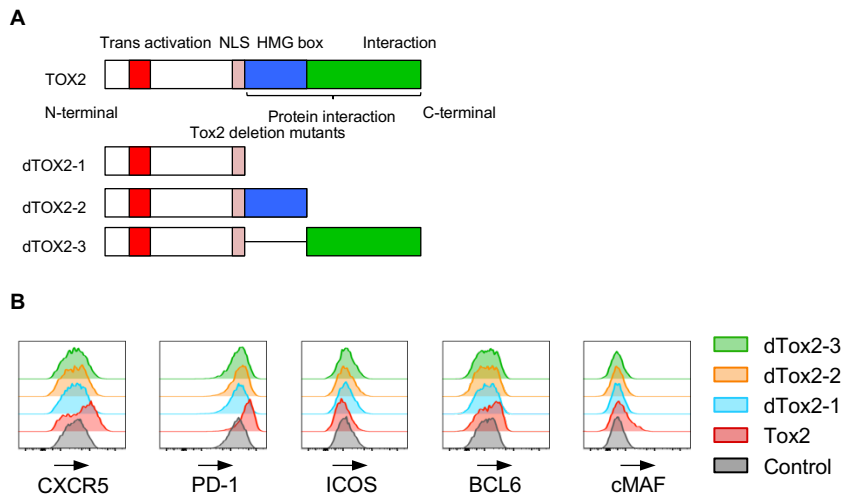

**Fig. S3 Tox2 mutants lacking the functional domain do not promote CXCR5 or PD-1 expression by GC Tfh cells**

- (A) Tox2 mutants were generated by either removing all protein interaction domain (dTOX2-1), interaction domain (dTOX2-2), or HMG box domain (dTOX2-3)
- (B) Expression of Tfh cell-associated molecules by control, TOX2, TOX2 deletion mutants lentiviral over-expressed GC Tfh cells. Expression CXCR5, PD-1, and ICOS on cell surface; and Bcl6 and cMaf in cell nucleus was analyzed.

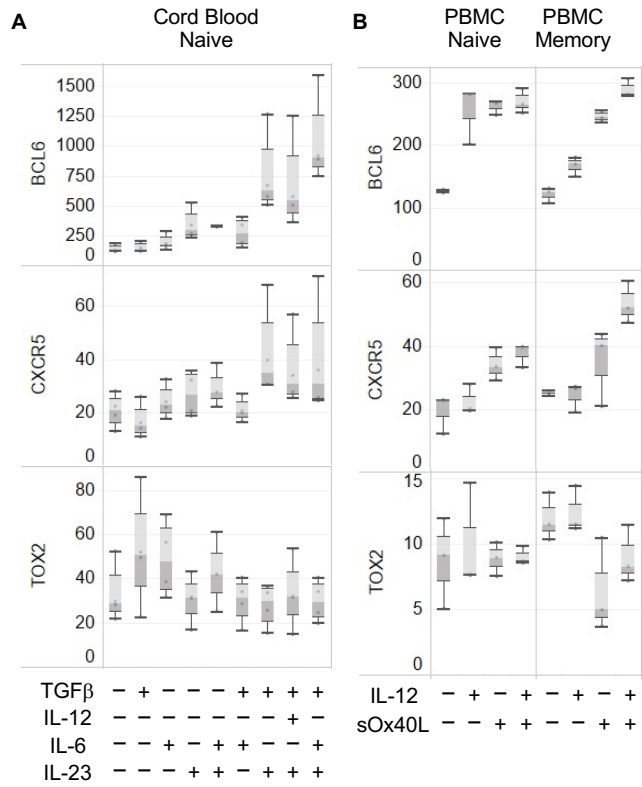

**Fig. S4 Tfh-promoting cytokine conditions do not induce TOX2**

(A, B) Expression of *BCL6*, *CXCR5*, *Tox* and *Tox2* by naive and memory CD4<sup>+</sup> T cells obtained from cord blood (H) and blood of human adults (I) cultured for following 4 d stimulation with CD3-CD28 mAbs in the presence of the indicated cytokines (CK) during the last 3 days. \**P* < 0.05 \*\**P* < 0.01

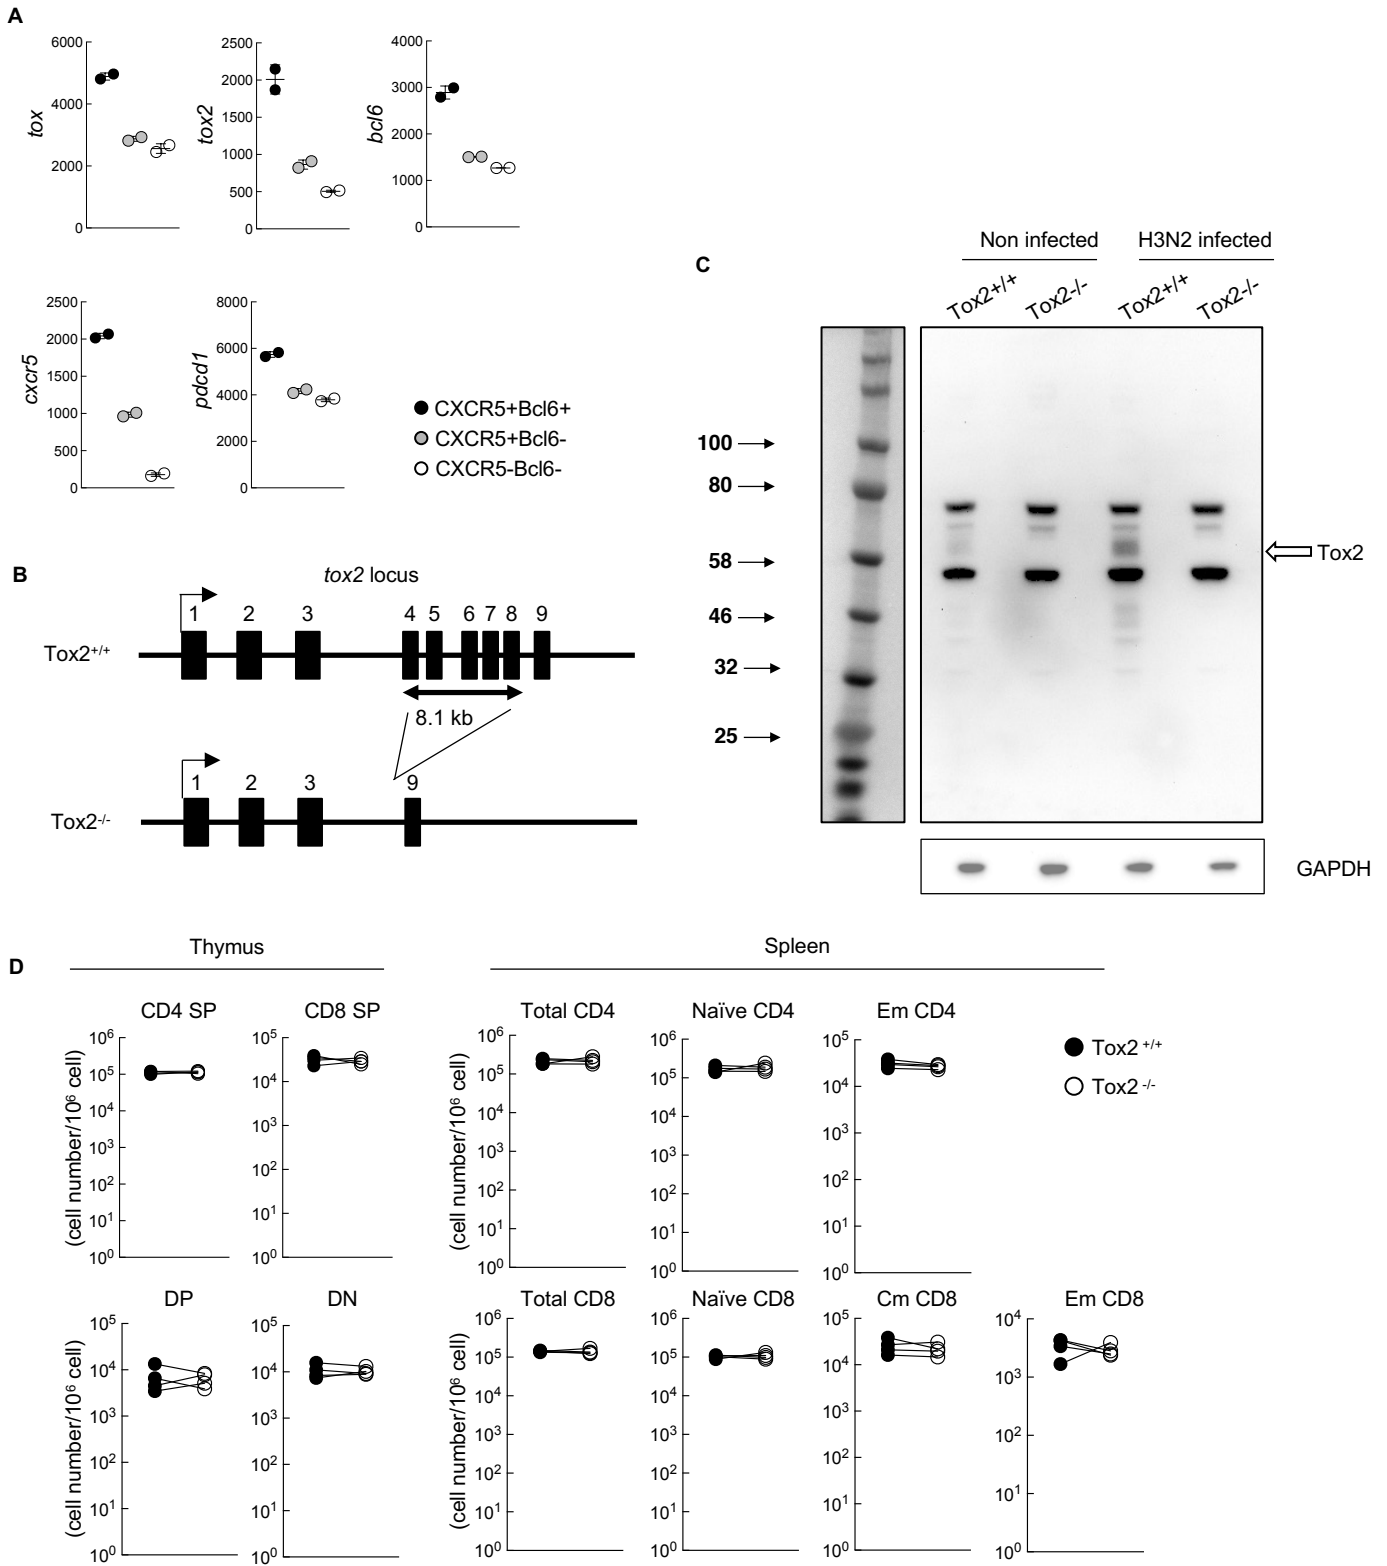

**Fig. S5 Generation of Tox2 deficient mice**

- (A) mRNA expression pattern of *tox*, *tox2*, and *bcl6* from mice spleen CXCR5-Bcl6<sup>-</sup>, CXCR5+Bcl6<sup>-</sup>, CXCR5+ Bcl6<sup>+</sup> Tfh cells. Data from GSE40068
- (B) Generation of Tox2 knock out mice. Exon 4-8 which codes HMG box domain and interaction domain was removed from the WT allele.
- (C) Expression of Tox2 was measured using a mAb to Tox2 by western blot in non infected and d14 H3N2 infected Tox2<sup>+/+</sup> and Tox2<sup>-/-</sup> mice Spleen. Whole splenocytes were used and equal amounts of protein were loaded per well to analyze the expression of Tox2.
- (D, E) CD4<sup>+</sup> T cell and CD8<sup>+</sup> T cell number in lymphocytes from Tox2<sup>+/+</sup> and Tox2<sup>-/-</sup> mice thymus (D) and spleen (E). Each symbol represents the result form an individual mouse paired with littermate.

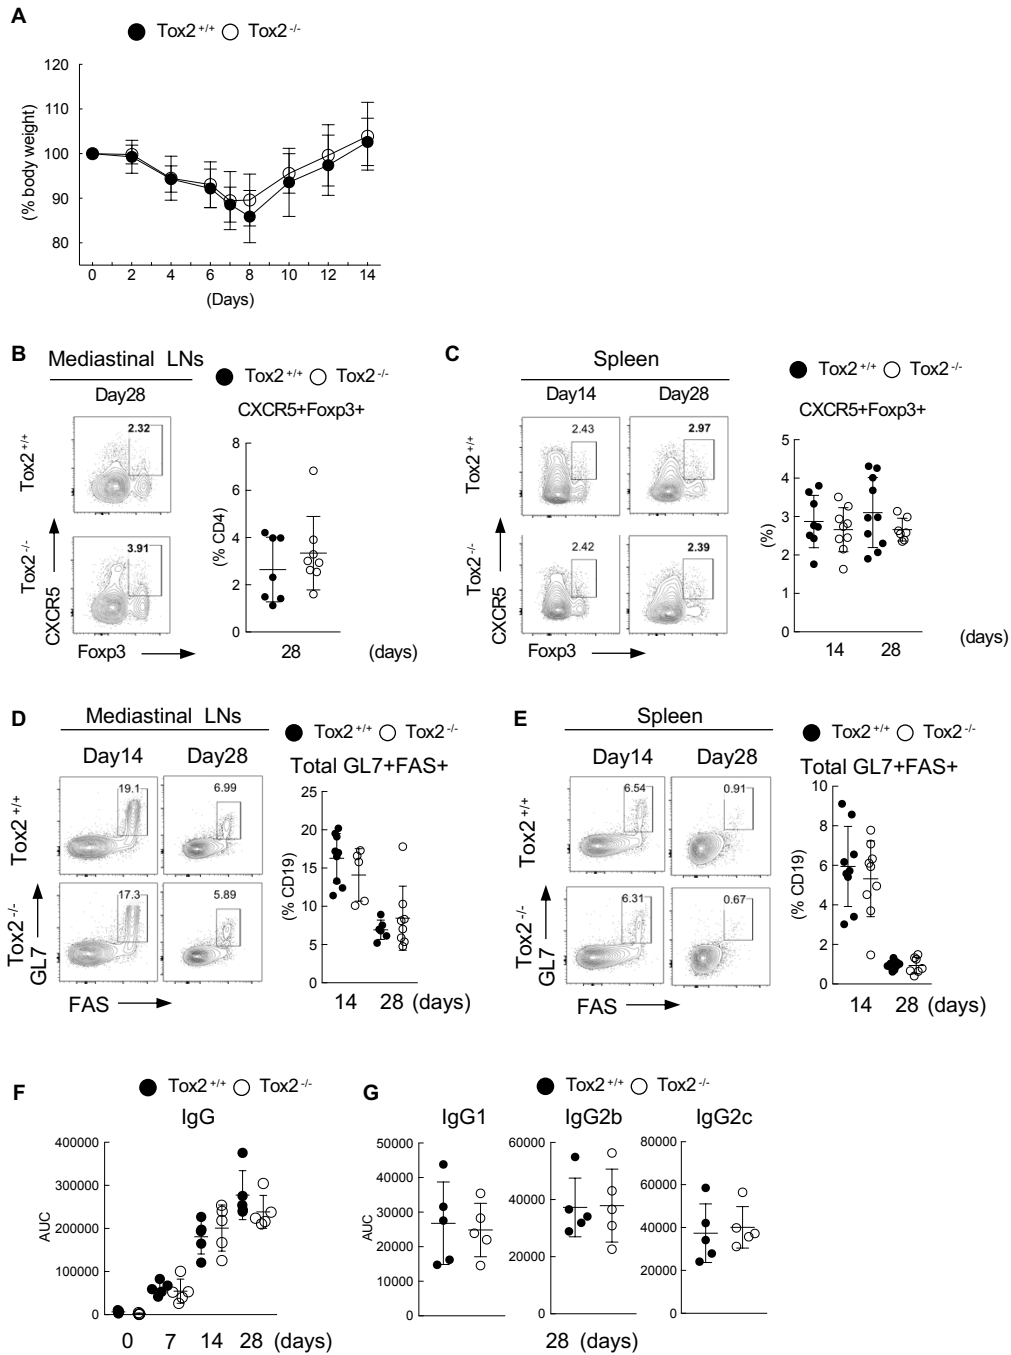

**Fig. S6 Tox2 deficiency does not affect GC generation and Tfr**

(A) % body weight of Tox2<sup>+/+</sup> and Tox2<sup>-/-</sup> mice infected with H3N2 influenza virus.

(B,C) Frequency of Foxp3<sup>+</sup>CXCR5<sup>+</sup> Tfr CD4<sup>+</sup> T cells in mediastinal LN (A) and spleen (B) from H3N2 infected C57BL/6 Tox2<sup>+/+</sup> and Tox2<sup>-/-</sup> mice at indicated time points.

(D,E) Frequency of total GL7<sup>+</sup>FAS<sup>+</sup> GC B cells in mediastinal LN (C) and spleen (D) at indicated time points.

(F,G) Serum was collected at indicated time points to analyze anti-HA IgG (G), IgG1, IgG2b, IgG2c (H) titer by ELISA.

Each symbol represents the result from an individual mouse. 5 to 9 WT and KO mice were used in each experiment.

\* $P < 0.05$  \*\* $P < 0.01$  \*\*\* $P < 0.001$

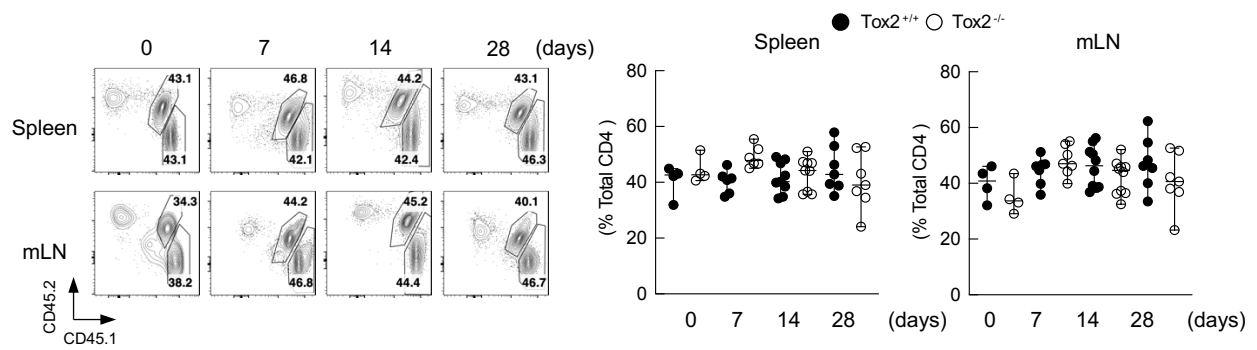

**Fig. S7 Frequency of Tox2 <sup>+/+</sup> and Tox2 <sup>-/-</sup> CD4<sup>+</sup> T cells were similar in both spleen and mLN before and after infection**

Frequency of CD45.1 (Tox2 <sup>+/+</sup>) and CD45.1/2 (Tox2 <sup>-/-</sup>) CD4<sup>+</sup> T cells in spleens (B) and in mediastina LNs at indicated time points after H3N2 influenza virus infection. A representative flow data (left) and the data set of four to ten mice are shown (right). Each symbol represents the result from an individual mouse. 4 to 9 BMC were used in each experiment.
